# Supplementary material
Source: publisher figshare collection journal article supplement (https://acs.figshare.com/ndownloader/files/4048606)
Supplement: Supplementary file 1 [file 4048606]

## Sheet: Sheet1
Protein ranking based on the D3/D1 ratio
Rank	Accession #	Description	Mean D3/D1 value	SD
1	IPI00826010	PRCD protein	1.20625	0.129474
2	IPI00716989	Retinal guanylyl cyclase 1	1.05549	0.0789588
3	IPI00944432	ATP8A2	1.04276	0.166926
4	IPI00717046	Regulator of G protein signaling 9 binding protein	1.01341	0.0801854
5	IPI00711518	ABC transporter	1	0
6	IPI00705045	Peripherin 2	0.987607	0.0434973
7	IPI00712873	Rhodopsin	0.975661	0.0706609
8	IPI00717828	Rod outer segment membrane protein 1	0.945921	0.0922454
9	IPI00696393	Retinal guanylyl cyclase 2	0.876308	0.104968
10	IPI00695391	G protein beta 5	0.864339	0.147503
11	IPI00704571	Regulator of G protein signaling 9	0.840845	0.0451821
12	IPI00692733	TMEM30A Transmembrane protein 30A	0.713109	0.106644
13	IPI00690805	Rod cGMP specific 3 5 cyclic phosphodiesterase subunit alpha	0.662289	0.0176992
14	IPI00711026	Rod cGMP specific 3 5 cyclic phosphodiesterase subunit beta	0.622372	0.0525446
15	IPI00711319	Guanine nucleotide binding protein G t subunit alpha 1	0.61814	0.0469637
16	IPI00824365	PROM1 prominin 1	0.60792	0.0743317
17	IPI00704754	Short wave sensitive opsin 1	0.491595	0.0619722
18	IPI00692703	Isoform 2 of Sodium potassium calcium exchanger 1	0.47368	0.0577943
19	IPI00718152	Ras related protein Rab 11B	0.467201	0.037594
20	IPI00829520	RAB1A member RAS oncogene family	0.456836	0.05841
21	IPI00712679	cGMP gated cation channel alpha 1	0.422418	0.035484
22	IPI00702852	Major prion protein	0.417565	0.0383065
23	IPI00696922	Long wave sensitive opsin 1	0.413345	0.0365425
24	IPI00699443	TM9SF2 transmembrane 9 superfamily member 2-like	0.413585	0.0402497
25	IPI00714657	Isoform CNG4A of Cyclic nucleotide gated cation channel beta 1	0.410731	0.0161154
26	IPI00699608	HSPA12A HSPA12B-like	0.404149	0.119999
27	IPI00706992	Synaptosomal associated protein 25	0.400142	0.0644699
28	IPI00907268	Sodium and chloride dependent glycine transporter 1	0.398444	0.068106
29	IPI00694198	Ras related protein Rab 5C	0.379429	0.0281986
30	IPI00703873	Rhodopsin kinase	0.376981	0.0483904
31	IPI00704752	Ras related protein Rab 7a	0.378645	0.0863282
32	IPI00703436	Ras related protein Rab 3A	0.374911	0.0627087
33	IPI00691826	Ras related protein Rab 18	0.372219	0.0262227
34	IPI00924299	Neuronal growth regulator 1	0.374642	0.0954607
35	IPI00691182	Synaptogyrin 1	0.374713	0.0911457
36	IPI00717110	PGRMC1 Membrane-associated progesterone receptor component 1	0.369164	0.0441659
37	IPI00695759	G protein gamma 1	0.365508	0.0760838
38	IPI00867107	Syntaxin 3	0.363431	0.0368564
39	IPI00705979	Thy 1 cell surface antigen	0.36357	0.0615331
40	IPI00689229	Ras related C3 botulinum toxin substrate 1	0.360121	0.0466147
41	IPI00701150	Recoverin	0.356238	0.0370615
42	IPI00715853	Monocarboxylate transporter 1	0.353284	0.0680276
43	IPI00716567	Guanine nucleotide binding protein G i subunit alpha 1	0.348005	0.0271105
44	IPI00924284	CACNA2D1 calcium channel, voltage-dependent, alpha 2/delta subunit 1	0.351339	0.141206
45	IPI00826405	SLC44A1 CDW92 antigen isoform 2, choline transporter	0.345973	0.0426194
46	IPI00842216	Rab2A	0.348791	0.0785357
47	IPI00708069	Guanine nucleotide binding protein G t subunit alpha 2	0.34155	0.0277022
48	IPI00760524	L lactate dehydrogenase B chain	0.342179	0.0336669
49	IPI00727050	Ras related protein Rab 1B	0.336733	0.0556382
50	IPI00703160	G protein beta 1	0.33329	0.0601947
51	IPI01003624	Limbic system associated membrane protein like	0.326972	0.009288
52	IPI00687292	G protein coupled receptor 37	0.328893	0.0523576
53	IPI00710326	Neurotrimin	0.324803	0.0246365
54	IPI00710012	CCT5 chaperonin containing TCP1, subunit 5	0.324528	0.0820027
55	IPI00716843	Guanine nucleotide binding protein G o subunit alpha	0.324255	0.0282728
56	IPI00699127	CA14 Uncharacterized protein	0.317411	0.0775012
57	IPI00711138	Synaptophysin	0.311645	0.0515211
58	IPI00786374	Ubiquitin 60S ribosomal protein L40	0.311053	0.0525623
59	IPI00698673	5 nucleotidase	0.310533	0.0746427
60	IPI00699622	Heat shock protein HSP 90 alpha	0.302637	0.0545437
61	IPI00825112	G protein alpha Q	0.296897	0.051067
62	IPI00714656	Solute carrier family 2 facilitated glucose transporter member 1	0.294423	0.0179543
63	IPI00698853	Neuronal membrane glycoprotein M6 a	0.292291	0.0406988
64	IPI00687859	Retinol binding protein 3	0.29148	0.0281997
65	IPI00695776	Ras related protein Rap 1b	0.291495	0.0398487
66	IPI00760424	Isoform Short of 14 3 3 protein beta alpha	0.289243	0.070407
67	IPI00706594	Tubulin beta 2C chain	0.288537	0.0445595
68	IPI00704553	SNAP91 81 kDa protein	0.287942	0.0331735
69	IPI00706317	cell adhesion molecule 2 like	0.287477	0.0483524
70	IPI00696116	Vesicle associated membrane protein 2	0.287174	0.054013
71	IPI00845192	SV2B protein	0.285497	0.0408936
72	IPI00705159	Sodium potassium transporting ATPase subunit alpha 1	0.284372	0.0187807
73	IPI00710515	Neural cell adhesion molecule 1	0.283421	0.0380735
74	IPI00712775	Elongation factor 1 alpha 1	0.281799	0.0509368
75	IPI00718480	Guanine nucleotide binding protein G z subunit alpha like	0.272685	0.0265119
76	IPI00699226	Plasma membrane Ca2 ATPase isoform 4xb	0.273736	0.0579863
77	IPI00710726	CCT8 T-complex protein 1 subunit theta	0.268217	0.0421973
78	IPI00716195	V type proton ATPase subunit d 1	0.270869	0.0401996
79	IPI00706808	Guanine nucleotide binding protein G I G S G O subunit gamma 2	0.268385	0.0328297
80	IPI00838449	ATPase Na K transporting beta 1 polypeptide	0.268676	0.0107215
81	IPI00705899	Tubulin alpha 1D chain	0.265055	0.0367869
82	IPI00716718	Glial fibrillary acidic protein	0.266399	0.0363255
83	IPI00704082	Sodium potassium transporting ATPase subunit beta 2	0.266459	0.0561815
84	IPI00709435	Heat shock protein HSP 90 beta	0.266035	0.0411823
85	IPI00694454	CACNA2D2 calcium channel, voltage-dependent, alpha 2/delta subunit 2	0.266216	0.0565556
86	IPI00716974	L lactate dehydrogenase A chain	0.265976	0.0459
87	IPI00697843	ASPH Aspartyl/asparaginyl beta-hydroxylase	0.259731	0.0632833
88	IPI00839060	Sodium potassium transporting ATPase subunit alpha 2	0.26198	0.0239902
89	IPI00710727	Transitional endoplasmic reticulum ATPase	0.26472	0.0917825
90	IPI00714624	CCT3 T-complex protein 1 subunit gamma	0.2622	0.0313048
91	IPI00732365	ATPase Na K transporting alpha 3 polypeptide isoform 1	0.260963	0.0427922
92	IPI00839408	Pyruvate kinase	0.260878	0.0419278
93	IPI00695917	Isoform Gnas 1 of Guanine nucleotide binding protein G s subunit alpha isoforms short	0.261207	0.0693551
94	IPI00689228	Vimentin	0.257823	0.0208494
95	IPI00718522	ACTR1A alpha-centractin	0.259896	0.0946076
96	IPI00924133	CNTFR ciliary neurotrophic factor receptor preproprotein-like	0.256939	0.0303874
97	IPI00708046	Tubulin beta 5 chain	0.256673	0.0301245
98	IPI00714294	Adenosylhomocysteinase	0.256681	0.0257897
99	IPI00716099	NCAM2 neural cell adhesion molecule 2	0.253198	0.0592064
100	IPI00711537	GNAI2 protein	0.25503	0.0454308
101	IPI00701995	Syntaxin 1B	0.255486	0.0549524
102	IPI00718035	Ras related protein Rab 8A	0.249736	0.0570326
103	IPI00696394	ATPase Ca transporting plasma membrane 2 isoform 2	0.250748	0.034997
104	IPI00688816	Clathrin heavy chain 1	0.24982	0.0289375
105	IPI00906554	Guanine nucleotide binding protein subunit alpha 11	0.245916	0.0912763
106	IPI00687234	Isoform 2 of Reticulon 3	0.249429	0.0629963
107	IPI00686981	Annexin A4	0.246693	0.0249234
108	IPI00696325	RPE7 protein	0.245674	0.0386561
109	IPI00685241	RPE retinal G protein coupled receptor	0.243611	0.0149112
110	IPI00693602	PRKACB PRKACB protein	0.243907	0.0267622
111	IPI00731148	X linked juvenile retinoschisis protein like	0.242441	0.0298298
112	IPI00696435	14 3 3 protein epsilon	0.243845	0.0324235
113	IPI00702055	CPNE1 Copine I	0.241033	0.0515141
114	IPI00706869	Guanine nucleotide binding protein G protein alpha inhibiting activity polypeptide 3	0.242814	0.0212301
115	IPI00703992	G protein beta 3	0.240351	0.0951235
116	IPI00689377	CCT6A T-complex protein 1 subunit zeta	0.239774	0.0229922
117	IPI00708398	Serum albumin	0.240359	0.0575816
118	IPI00700241	Solute carrier family 3 member 2	0.238929	0.0308325
119	IPI00699372	Isoform 1 of V type proton ATPase 116 kDa subunit a isoform 1	0.239405	0.0508802
120	IPI00716827	Creatine kinase B type	0.237507	0.0134177
121	IPI00696555	Neural cell adhesion molecule L1	0.238262	0.0354367
122	IPI00710020	Protein S100 A14	0.237364	0.0645132
123	IPI00696360	AP2B1 AP-1 complex subunit beta-1	0.235622	0.0172454
124	IPI00695208	Protein kinase C alpha type	0.233082	0.0502457
125	IPI00696554	Heterogeneous nuclear ribonucleoprotein K	0.235468	0.0561629
126	IPI00687338	ACHE Isoform H of Acetylcholinesterase	0.234705	0.0347063
127	IPI00694846	Neurofascin homolog	0.235006	0.0254943
128	IPI00707320	14 3 3 protein theta	0.235197	0.0726585
129	IPI00824885	Estradiol 17 beta dehydrogenase 12	0.236706	0.0994354
130	IPI00688522	V type proton ATPase subunit B brain isoform	0.234128	0.0721658
131	IPI00705657	Isoform A of S arrestin	0.233228	0.0237614
132	IPI00698900	Actin cytoplasmic 1	0.232236	0.010581
133	IPI00711219	42 kDa protein Neuroplasmin	0.232775	0.026542
134	IPI00691361	CAP1 Adenylyl cyclase-associated protein 1	0.232839	0.0320914
135	IPI00688948	NME1-2 Nucleoside diphosphate kinase A 1	0.23415	0.0837294
136	IPI00732001	spectrin alpha chain brain	0.232293	0.0511312
137	IPI00687539	DPYSL3 protein	0.232202	0.0520246
138	IPI00717917	Cell adhesion molecule 3	0.229746	0.0217145
139	IPI00718487	Sodium and chloride dependent GABA transporter 3 like	0.230475	0.0449089
140	IPI00696766	Glutathione S transferase mu 3	0.229512	0.0806576
141	IPI00708169	ANO2 Anoctamin-2-like	0.226525	0.0207589
142	IPI00702928	Synaptotagmin 1	0.227253	0.033472
143	IPI00712822	Contactin 1	0.225067	0.00636841
144	IPI00693106	14 3 3 protein gamma	0.224052	0.044078
145	IPI00686092	Peroxiredoxin 1	0.226432	0.064007
146	IPI00953862	ITGA2 integrin alpha-2	0.222037	0.0337646
147	IPI00695448	14 3 3 protein eta	0.220241	0.0375642
148	IPI00713151	SLC38A3 Solute carrier family 38, member 3	0.221	0.025933
149	IPI00685357	6 phosphofructokinase muscle type	0.221314	0.0449955
150	IPI00699717	D 3 phosphoglycerate dehydrogenase	0.220403	0.0319568
151	IPI00707925	Solute carrier family 12 potassium chloride transporter member 5	0.220425	0.0626678
152	IPI00711241	TALDO1 Transaldolase	0.220834	0.101594
153	IPI00714950	ME1 Malic enzyme	0.220298	0.13212
154	IPI00721227	N ethylmaleimide sensitive factor	0.217879	0.0175903
155	IPI00708267	Synaptic vesicle glycoprotein 2A	0.220069	0.0976035
156	IPI00718220	6 phosphofructokinase liver type	0.219075	0.0586457
157	IPI00924138	CNTN4 contactin-4	0.217967	0.0499697
158	IPI00704836	Heat shock protein beta 1	0.215106	0.031156
159	IPI00705815	Brain acid soluble protein 1	0.219006	0.0756352
160	IPI00699845	SUCLA2 Succinyl-CoA ligase [ADP-forming] subunit beta, mitochondrial	0.216087	0.0595327
161	IPI00689857	Peroxiredoxin 6	0.218195	0.0850218
162	IPI00713756	Plasma membrane calcium transporting ATPase	0.214358	0.0176022
163	IPI00971587	IGF1R insulin-like growth factor 1 receptor	0.215296	0.0698588
164	IPI00713814	Glyceraldehyde 3 phosphate dehydrogenase	0.213809	0.0189003
165	IPI00852427	PPP3CC Serine/threonine-protein phosphatase	0.211943	0.0623066
166	IPI00689325	Protein disulfide isomerase A3	0.211586	0.0205143
167	IPI00690367	V ral simian leukemia viral oncogene homolog A	0.211188	0.0270519
168	IPI00714149	DNM1 Dynamin-1	0.207008	0.0470964
169	IPI00702532	SH3GL2 SH3-domain GRB2-like 2	0.208486	0.0382986
170	IPI00825390	Spectrin beta chain brain 1	0.208722	0.0588195
171	IPI00687211	Hexokinase 1	0.20898	0.088725
172	IPI00904005	Syntaxin binding protein 1	0.206728	0.0386614
173	IPI00841417	GUK1 guanylate kinase isoform a	0.207279	0.0501745
174	IPI00716692	Tubulin beta-2A chain	0.204517	0.0314223
175	IPI00871078	Calnexin	0.203263	0.0186913
176	IPI00692247	Stress 70 protein mitochondrial	0.206936	0.126404
177	IPI00708526	Heat shock cognate 71 kDa protein	0.202337	0.0195323
178	IPI00689965	AHNAK2 AHNAK nucleoprotein 2	0.19802	0.0389042
179	IPI00698007	Electrogenic sodium bicarbonate cotransporter 1	0.195411	0.0187329
180	IPI00709805	Mu crystallin homolog	0.195424	0.0268143
181	IPI00707921	Phosducin	0.196895	0.0467344
182	IPI01003545	AP2A1 adaptor-related protein complex 2, alpha 1 subunit	0.196057	0.0733984
183	IPI00841695	CCT4 T-complex protein 1 subunit delta	0.191861	0.0113699
184	IPI00707095	Alpha enolase	0.191334	0.0423146
185	IPI00733888	RUFY3 RUN and FYVE domain containing protein 3	0.193467	0.209183
186	IPI00727371	Glutathione S transferase M2	0.19043	0.0453081
187	IPI00712819	Guanine nucleotide binding protein G I G S G T subunit beta 2	0.18998	0.0551211
188	IPI00689521	Sodium- and chloride-dependent GABA transporter 1	0.18743	0.0167182
189	IPI00690534	TF Serotransferrin	0.187382	0.0531167
190	IPI00703110	14 3 3 protein zeta delta	0.185278	0.00886405
191	IPI00695031	ORP150 Uncharacterized protein	0.185257	0.0395794
192	IPI00717284	GLG1 Golgi apparatus protein 1	0.186331	0.119717
193	IPI00692865	Endoplasmin	0.183557	0.0480202
194	IPI00694255	GSN Gelsolin	0.181006	0.0504377
195	IPI00707581	MYO6 myosin VI	0.17984	0.0347217
196	IPI00694612	Aspartate aminotransferase cytoplasmic	0.178783	0.0384185
197	IPI00717234	78 kDa glucose regulated protein	0.177797	0.018879
198	IPI00760457	Glutamine synthetase	0.178657	0.0453374
199	IPI00696237	DNPEP Aspartyl aminopeptidase	0.179213	0.0616902
200	IPI00703753	ENPP1 ecto-nucleotide pyrophosphatase/phosphodiesterase 1-like	0.177726	0.0375541
201	IPI00712695	Retinaldehyde binding protein 1	0.175951	0.019702
202	IPI00704353	Tubulin alpha 4A chain	0.176565	0.0138747
203	IPI00692093	Annexin A5	0.176974	0.029517
204	IPI00706002	Annexin A2	0.178	0.0511933
205	IPI00699719	CACNA2D1 calcium channel, voltage-dependent, alpha 2/delta subunit 1	0.173533	0.0769988
206	IPI00733218	EPHB2 EPH receptor B2 isoform 9	0.177796	0.11309
207	IPI00760436	Myristoylated alanine rich C kinase substrate	0.17416	0.0338495
208	IPI00702305	PYGB Glycogen phosphorylase, brain form	0.171645	0.0486054
209	IPI00695508	Calmodulin	0.172391	0.0410604
210	IPI00698338	Dihydropyrimidinase related protein 2	0.17121	0.018395
211	IPI00702468	CRYZ Zeta-crystallin	0.170786	0.0674508
212	IPI00716455	Hemoglobin subunit beta	0.167741	0.0101637
213	IPI00712596	EPHX1 Epoxide hydrolase 1, microsomal	0.171014	0.129855
214	IPI00703380	Septin 6	0.169093	0.0485487
215	IPI00688651	CAMK2D Calcium/calmodulin-dependent protein kinase type II subunit delta	0.164962	0.00959237
216	IPI00687560	PCBP1 Poly(rC)-binding protein 1	0.16161	0.0778071
217	IPI00710895	Phosphoglycerate kinase 1	0.164123	0.0165087
218	IPI00711441	Neutral amino acid transporter A	0.163136	0.0181827
219	IPI00691069	NCEH1 Neutral cholesterol ester hydrolase 1	0.163385	0.0125101
220	IPI00852561	Fructose bisphosphate aldolase	0.162286	0.0103846
221	IPI00688998	Transforming protein RhoA	0.161629	0.0397319
222	IPI00696008	ATP6V1C1 V-type proton ATPase subunit C 1	0.16337	0.0535394
223	IPI00868644	Annexin A6	0.161995	0.0485917
224	IPI00867179	Heat shock 70kD protein binding protein	0.159894	0.0638831
225	IPI00911600	GNA13 guanine nucleotide binding protein, alpha 12-like	0.156563	0.0833099
226	IPI00826624	V type proton ATPase catalytic subunit A	0.157358	0.0323256
227	IPI00700431	Calretinin	0.155734	0.0168696
228	IPI00706329	Cadherin 2	0.154788	0.0213012
229	IPI00710783	Hemoglobin subunit alpha	0.152697	0.0233655
230	IPI00716694	NPEPPS Uncharacterized protein	0.152681	0.0684566
231	IPI00701214	ARR3 arrestin-C	0.153853	0.0499816
232	IPI00694750	Sideroflexin 1	0.152704	0.0470246
233	IPI00708177	Alpha soluble NSF attachment protein	0.150893	0.0307412
234	IPI00718218	ANK2 ankyrin 2	0.15114	0.0154043
235	IPI00689646	Cellular retinoic acid binding protein 1	0.152123	0.046072
236	IPI00686331	Excitatory amino acid transporter 1	0.150904	0.0262834
237	IPI00718057	Protein NDRG2	0.147819	0.0166164
238	IPI00706314	ADP ATP translocase 1	0.148957	0.0547665
239	IPI00711418	PLXNB2 plexin B2	0.146122	0.0289413
240	IPI00695660	ITGB1 Isoform 1 of Integrin beta-1	0.147052	0.0367046
241	IPI00687601	microtubule associated protein 1B	0.14482	0.0159868
242	IPI00726312	Cytoplasmic dynein 1 heavy chain	0.145082	0.0182718
243	IPI00697691	Erythrocyte membrane protein band 4 like 2	0.142083	0.0195715
244	IPI00691963	Calreticulin	0.140465	0.0572932
245	IPI00716246	Carbonic anhydrase 2	0.138846	0.0216404
246	IPI00699109	Malate dehydrogenase cytoplasmic	0.136692	0.0282578
247	IPI00706541	Isoform B of Phosphate carrier protein mitochondrial	0.138377	0.0298245
248	IPI00847093	RCN1 reticulocalbin-1	0.135949	0.0487533
249	IPI00713760	Rab GDP dissociation inhibitor beta	0.135251	0.0540465
250	IPI00706572	MDGA2 MAM domain containing glycosylphosphatidylinositol anchor 2	0.135748	0.210657
251	IPI00730808	RPN1 RPN1 protein	0.134689	0.0354319
252	IPI00713137	Aspartate aminotransferase mitochondrial	0.133039	0.00586524
253	IPI00702891	Endoplasmic reticulum resident protein 29	0.131132	0.0318628
254	IPI00687246	Voltage dependent anion selective channel protein 2	0.133175	0.0393901
255	IPI00688257	Heterogeneous nuclear ribonucleoprotein U	0.127914	0.0887973
256	IPI00685758	MPP2 MAGUK p55 subfamily member 2	0.130161	0.0411586
257	IPI00705603	RTN4 protein	0.131412	0.0602414
258	IPI00729057	Inosine 5 monophosphate dehydrogenase	0.131463	0.0607858
259	IPI00709465	Protein disulfide isomerase	0.129122	0.0170485
260	IPI00702765	Protein DJ 1	0.124645	0.0425503
261	IPI00701643	PGM1 Phosphoglucomutase-1	0.123417	0.0411841
262	IPI00710101	V type proton ATPase subunit E 1	0.127327	0.0800662
263	IPI00698594	Rab GDP dissociation inhibitor alpha	0.125214	0.0345394
264	IPI00904104	Transketolase	0.122153	0.0709378
265	IPI00693823	STXBP3 STXBP3 protein	0.120499	0.0159071
266	IPI00694037	GPM6B protein	0.12064	0.0448742
267	IPI01001593	CNTNAP1 contactin associated protein 1-like	0.117845	0.0439603
268	IPI00710354	ACLY ATP-citrate synthase	0.116593	0.0329842
269	IPI00714446	Glucose 6 phosphate isomerase	0.115958	0.00832923
270	IPI00690870	Aconitate hydratase mitochondrial	0.116552	0.0216733
271	IPI00689854	ATPase Ca transporting cardiac muscle slow twitch 2 isoform 2	0.115583	0.0475873
272	IPI00702098	PPIB Peptidyl-prolyl cis-trans isomerase B	0.11403	0.0141544
273	IPI00971535	NCL nucleolin	0.114101	0.0281903
274	IPI00704735	Phosphatidylethanolamine binding protein 1	0.112483	0.0361793
275	IPI00706142	CAND1 Cullin-associated NEDD8-dissociated protein 1	0.112153	0.044239
276	IPI00696451	CAPZA2 F-actin-capping protein subunit alpha-2	0.108916	0.0231782
277	IPI00728791	N G N G dimethylarginine dimethylaminohydrolase 1	0.108744	0.00886196
278	IPI00698069	Neurocalcin delta	0.102002	0.0998957
279	IPI00706942	Triosephosphate isomerase	0.105827	0.0104597
280	IPI00716121	SERPINF1 Pigment epithelium-derived factor	0.10674	0.0473839
281	IPI00698589	Phosphoglycerate mutase 1	0.105496	0.0100319
282	IPI00712472	PSMD5 26S proteasome non-ATPase regulatory subunit 5	0.106206	0.0456176
283	IPI00688236	Catenin beta 1	0.105507	0.0374397
284	IPI00687074	NDRG3 Protein NDRG3	0.103794	0.0149703
285	IPI00694876	LOC613316;LOC790868 cytochrome b-c1 complex subunit 2, mitochondrial-like	0.105214	0.048266
286	IPI00715211	VAT1L Vesicle amine transport protein 1 homolog (T. californica)-like	0.105074	0.0528816
287	IPI00700783	Isoform Alpha of V type proton ATPase subunit H	0.0986178	0.0876764
288	IPI00694295	ATP synthase subunit alpha mitochondrial	0.101648	0.0096904
289	IPI00693090	Protein disulfide isomerase family A member 6	0.0982744	0.0741111
290	IPI00696052	Elongation factor Tu mitochondrial	0.0991662	0.0426679
291	IPI00697648	Actin alpha skeletal muscle	0.0968287	0.00722419
292	IPI00706815	FSCN1 Fascin homolog 1, actin-bundling protein	0.0955948	0.0161898
293	IPI00704257	Isoform 1 of Cell division control protein 42 homolog	0.0913409	0.0834023
294	IPI00711238	EIF4A2 Eukaryotic initiation factor 4A-II	0.0977305	0.0904021
295	IPI00685274	ADD3 Adducin 3	0.09387	0.0909345
296	IPI00695799	IGLON5 IgLON family member 5	0.0863647	0.0760075
297	IPI00694787	ANXA7 Annexin A7	0.0898835	0.0440129
298	IPI00685232	EPPK1 Plectin 6	0.0863539	0.0183382
299	IPI00705734	Fatty acid binding protein epidermal	0.0869781	0.0417668
300	IPI00705378	ADP ATP translocase 3	0.084733	0.0110591
301	IPI00708887	Septin 2	0.0832429	0.0499182
302	IPI00691285	Alpha internexin	0.0823363	0.0163764
303	IPI00716130	UBA1 Ubiquitin-like modifier-activating enzyme 1	0.0803127	0.0129845
304	IPI00686173	Glutathione S transferase P	0.0788805	0.019279
305	IPI00692907	Dihydrolipoyllysine residue succinyltransferase component of 2 oxoglutarate dehydrogenase complex m	0.0761614	0.053978
306	IPI00702768	ALPL Alkaline phosphatase, tissue-nonspecific isozyme	0.0735225	0.0216158
307	IPI00697813	MAP1A microtubule-associated protein 1A-like	0.0738769	0.0239484
308	IPI00712250	Malate dehydrogenase mitochondrial	0.073897	0.0227853
309	IPI00700476	cAMP dependent protein kinase type II beta regulatory subunit	0.0721023	0.0188145
310	IPI00694641	EZR Ezrin	0.0699923	0.0288311
311	IPI00709219	MYH10 Myosin-10	0.0678328	0.0144053
312	IPI00707201	GLUD1 Glutamate dehydrogenase 1, mitochondrial	0.0672871	0.0382138
313	IPI00890678	GBE1 1,4-alpha-glucan branching enzyme 1	0.0649534	0.0643762
314	IPI00708027	NDUFS1 NADH-ubiquinone oxidoreductase 75 kDa subunit, mitochondrial	0.0670244	0.0223226
315	IPI00823901	PURA purine-rich element binding protein A-like	0.0647723	0.0289951
316	IPI00706632	EEF1G Elongation factor 1-gamma	0.0643153	0.0387727
317	IPI00699260	Citrate synthase mitochondrial	0.0631445	0.0130496
318	IPI00714055	CYB5A Cytochrome b5	0.0605745	0.0255569
319	IPI00708582	VDAC5P protein	0.0581076	0.0395925
320	IPI00730219	SLC25A12 SLC25A12 protein	0.0561527	0.012205
321	IPI00703129	Voltage dependent anion selective channel protein 1	0.0536868	0.00849378
322	IPI00697285	Peptidyl prolyl cis trans isomerase A	0.0540693	0.0152365
323	IPI00693643	Cytochrome b c1 complex subunit 1 mitochondrial	0.051759	0.0302145
324	IPI01002905	60 kDa heat shock protein mitochondrial	0.05003	0.0143088
325	IPI00717884	ATP synthase subunit beta mitochondrial	0.0456967	0.00456715
326	IPI00692034	Creatine kinase U type mitochondrial	0.0427493	0.0141943
327	IPI00709990	Isoform 2 of C terminal binding protein 2	0.0431362	0.0118375
328	IPI00701244	PI4KA Phosphatidylinositol 4-kinase alpha	0.0419083	0.0348443
329	IPI00713198	CD44 antigen precursor	0.0409781	0.0131374
330	IPI00685691	RUVBL1 RUVBL1 protein	0.0312676	0.0182546
331	IPI00717272	CYCS Cytochrome c	0.0320423	0.0145456
332	IPI00702917	NDUFV1 NADH dehydrogenase [ubiquinone] flavoprotein 1, mitochondrial	0.0305335	0.0132162
333	IPI00708779	Cytochrome c oxidase subunit 2	0.027806	0.0151841
334	IPI00695094	MYH14 myosin, heavy polypeptide 14-like	0.0187903	0.0140867
335	IPI00711874	CNTN2 Contactin 2-like	0.016177	0.0153716
